# Supplementary material for: Whole genome sequencing reveals extended natural transformation in Campylobacter impacting diagnostics and the pathogens adaptive potential
Source: PubMed Central journal article supplement (PMC7048796; doi:10.1038/s41598-020-60320-y), 2020-02-28

## Supplementary Figures

### **Whole genome sequencing reveals extended natural transformation in *Campylobacter* impacting diagnostics and the pathogens adaptive potential**

Running title: WGS analysis of *Campylobacter* hybrid strains

Julia C. Golz, Lennard Epping, Marie-Theres Knüver, Maria Borowiak, Felix Hartkopf,

Carlus Deneke, Burkhard Malorny, Torsten Semmler, Kerstin Stingl

**Suppl. Fig. S1.** Alignment of target sequences from hybrid and half hybrid strains used for species differentiation in various published PCR assays. Primers and probes are aligned to target sequences of reference strains *C. jejuni* NCTC 11168 and *C. coli* BfR-CA-09557. Hybrids and half-hybrids with an introgression of  $\geq 1$  k-mer in the target gene were analyzed. Identified variants in the respective strains are detailed in Suppl. Tab. S1. Ruler 1, base location of target sequences of NCTC 11168 and in g) of BfR-CA-09557. a) *mapA* target according to <sup>3,5</sup>; b) *ceuE* target according to <sup>3,5</sup>; c) *mapA* target according to <sup>25</sup>; d) *ceuE* target according to <sup>25</sup>; e) *cpn60* target according to <sup>24</sup>; f) *cadF* target according to <sup>29</sup>; g) *cadF* target according to <sup>28</sup>.

Suppl. Fig. S1

a)

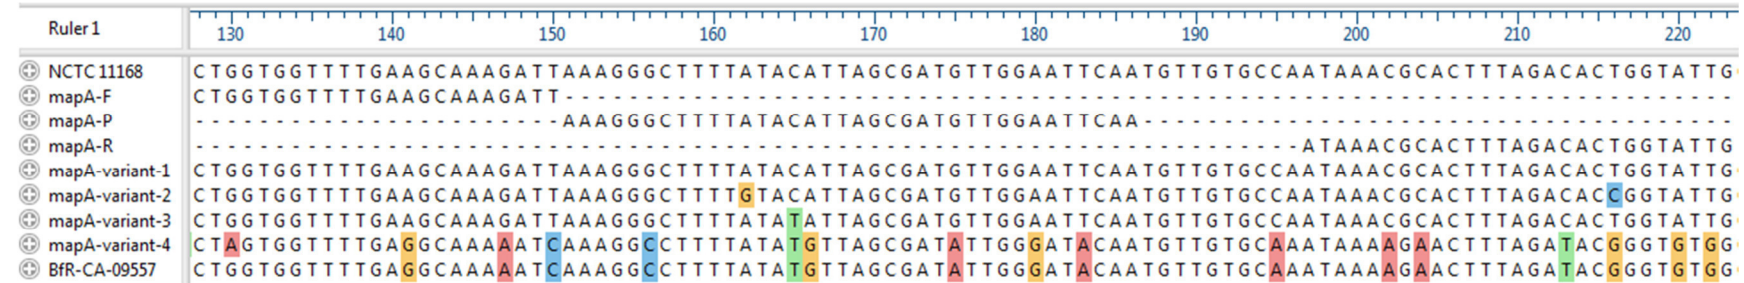

b)

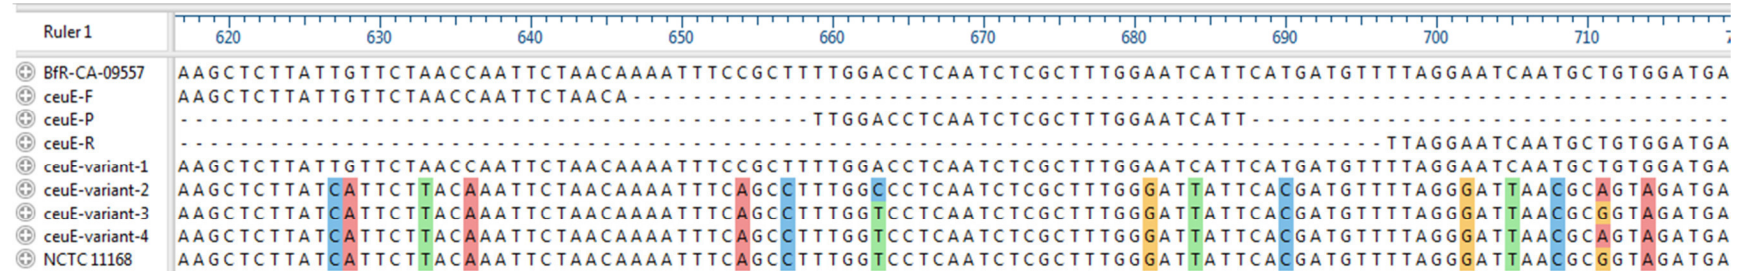

c)

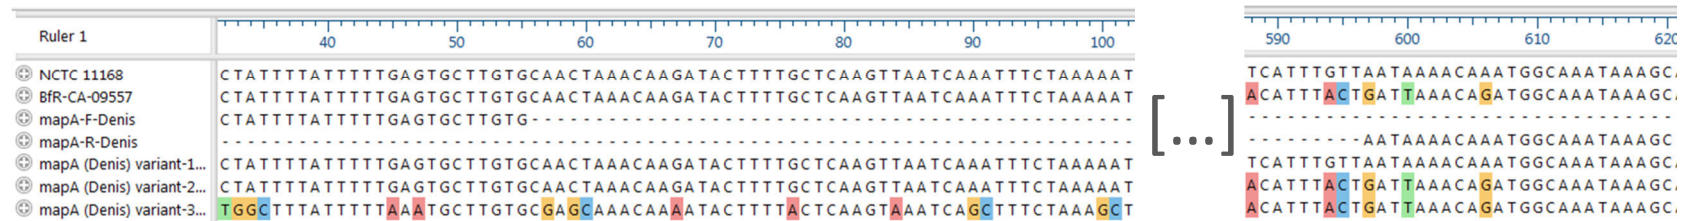

d)

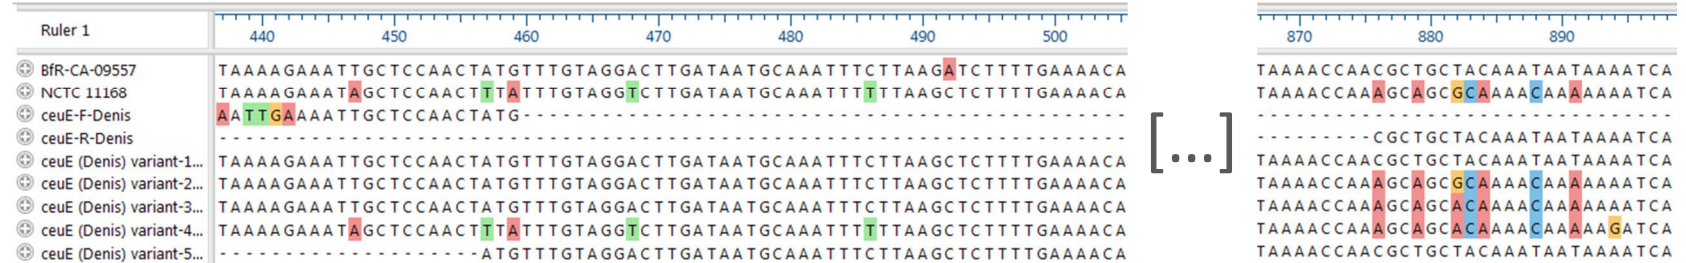

e)

| Ruler 1         | 630  | 640     | 650      | 660     | 670    | 680      | 690      | 700    | 710       |          |        |        |          |     |
|-----------------|------|---------|----------|---------|--------|----------|----------|--------|-----------|----------|--------|--------|----------|-----|
| BfR-CA-09557    | TGAC | GGTAGA  | ACTTTCAA | ATCC    | TATATC | TGCTTTTT | GATAAAAA | AAATTG | CAAATTTAA | AAGATTTG | TTACCG | TTTTAG | AACAAATT | CAA |
| Cc-JH0041       | TGAC | GGTAGA  | ACTTTCAA | ATCC    |        |          |          |        |           |          |        |        |          |     |
| Cc-JH0042       |      |         |          |         |        |          |          |        |           |          |        |        |          |     |
| NCTC 11168      | TGAC | AGTAGAG | CTTTCAAG | CCCTTAT | ATCCTG | CTTTTT   | GATAAAAA | AAATTG | CAAATTTAA | AAGATTTA | TTACCG | TTTTAG | AACAAATT | CAA |
| Cj-JH0039       |      |         |          |         |        |          |          |        |           |          |        |        |          |     |
| Cj-JH0040       |      |         |          |         |        |          |          |        |           |          |        |        |          |     |
| cpn60-variant-1 | TGAC | AGTAGAG | CTTTCAAG | CCCTTAT | ATCCTG | CTTTTT   | GATAAAAA | AAATTG | CAAATTTAA | AAGATTTA | TTACCG | TTTTAG | AACAAATT | CAA |
| cpn60-variant-2 | TGAC | AGTAGAG | CTTTCAAG | CCCTTAT | ATCCTG | CTTTTT   | GATAAAAA | AAATTG | CAAATTTAA | AAGATTTA | TTACCG | TTTTAG | AACAAATT | CAA |

  

| Ruler 1         | 730      | 740    | 750       | 760     | 770     | 780      | 790    | 800    |          |        |        |        |        |
|-----------------|----------|--------|-----------|---------|---------|----------|--------|--------|----------|--------|--------|--------|--------|
| BfR-CA-09557    | AAAACAGG | GAAACC | ACTTTTAAT | CATCGCT | GGAAGAT | ATCGAAGG | TGAAGC | ACTTGC | AACTTTAG | TTGTAA | CAAACT | ACGCGG | CGTATA |
| Cc-JH0041       |          |        |           |         |         |          |        |        |          |        |        |        |        |
| Cc-JH0042       |          |        |           |         |         |          |        |        |          |        |        |        |        |
| NCTC 11168      | AAAACAGG | CAAACC | ACTTTTAAT | TATCGCT | GGAAGAT | TGAAGG   | TGAAGC | GCTTGC | AACTTTG  | TTGTAA | AAACTT | CGCGGT | GTTCTT |
| Cj-JH0039       |          |        |           |         |         |          |        |        |          |        |        |        |        |
| Cj-JH0040       |          |        |           |         |         |          |        |        |          |        |        |        |        |
| cpn60-variant-1 | AAAACAGG | CAAACC | ACTTTTAAT | TATCGCT | GGAAGAT | TGAAGG   | TGAAGC | GCTTGC | AACTTTG  | TTGTAA | AAACTT | CGCGGT | GTTCTT |
| cpn60-variant-2 | AAAACAGG | CAAACC | ACTTTTAAT | TATCGCT | GGAAGAT | TGAAGG   | TGAAGC | GCTTGC | AACTTTG  | TTGTAA | AAACTT | CGCGGT | GTTCTT |

f)

| Ruler 1          | 300        | 310      | 320      | 330      | 340     | 350      | 360      | 370    | 380     | 390      |          |          |        |          |          |
|------------------|------------|----------|----------|----------|---------|----------|----------|--------|---------|----------|----------|----------|--------|----------|----------|
| ⊕ BfR-CA-09557   | GAGAAATTTT | ATTTTTAT | TGGTTTAG | CTGGTGGG | GATATG  | AGGATTTT | CTAAAGGC | GCTTTT | GATAATA | AAAAGTGG | AGGATTTG | GCCATTAT | TGGAGC | AGGTTTAA |          |
| ⊕ CC-cadF_F      | GAGAAATTTT | ATTTTTAT | TGGTTTAG | CTGGT    |         |          |          |        |         |          |          |          |        |          |          |
| ⊕ CC-cadF_P      |            |          |          |          |         |          |          |        |         |          |          |          |        |          |          |
| ⊕ CC-cadF_R      |            |          |          |          |         |          |          |        |         |          |          |          |        |          |          |
| ⊕ cadF-variant-1 | GAGAAATTTT | CTATGG   | TTTAGCA  | AGGTGGA  | GGATATG | AGGATTTT | CAATGCT  | GCTTAT | GATAATA | AAAAGC   | GGTGG    | ATTGGAC  | CATTAT | TGGTGC   | GGGTGTAA |
| ⊕ NCTC 11168     | GAGAAATTTT | CTATGG   | TTTAGCA  | AGGTGGA  | GGATATG | AGGATTTT | CAATGCT  | GCTTAT | GATAATA | AAAAGC   | GGTGG    | ATTGGAC  | CATTAT | TGGTGC   | GGGTGTAA |

g)

| Ruler 1                  | 110       | 120      | 540   | 550 | 560   | 570   | 580 | 860  | 870      |        |           |      |         |
|--------------------------|-----------|----------|-------|-----|-------|-------|-----|------|----------|--------|-----------|------|---------|
| ⊕ NCTC 11168             | TTGAAGGTA | ATTTAGAT | TGGAT | GAA |       |       |     | GTTG | TTGCTAAT | GAACTT | GAAAAATAT |      |         |
| ⊕ FU - Campylobacter ... | TTGAAGGTA | ATTTAGAT | TGG   |     |       |       |     |      |          |        |           |      |         |
| ⊕ Cc-R2                  |           |          |       |     |       |       |     |      |          |        |           |      |         |
| ⊕ Cj-R3                  |           |          |       |     |       |       |     |      |          |        |           |      |         |
| ⊕ cadF-variant-1         | TTGAAGGTA | ATTTAGAT | TGGAT | GAA |       |       |     | GTTG | TTGCTAAT | GAACTT | GAAAAATAT |      |         |
| ⊕ BfR-CA-09557           | TTGAAGGTA | ATTTAGAT | TGGAT | GAA | GCAAA | CAAAA | GAA | GTA  | GTTA     | ATAA   | CCTCAAG   | TGTA | ACCCCTG |

**Suppl. Fig. S2.** Heatmap visualization of genes with at least 20 % k-mer coverage of *C. jejuni* sequences identified in at least one of the 29 Cc/Cj hybrid strains (with >10 % *C. jejuni* introgression) X-axis, strains; y-axis, genes, sorted according to gene location in the reference *C. jejuni* NCTC 11168 sequence. Colours indicate coverage of gene length by *C. jejuni* sequence specific k-mers (16 bp) in % as detailed in the figure.



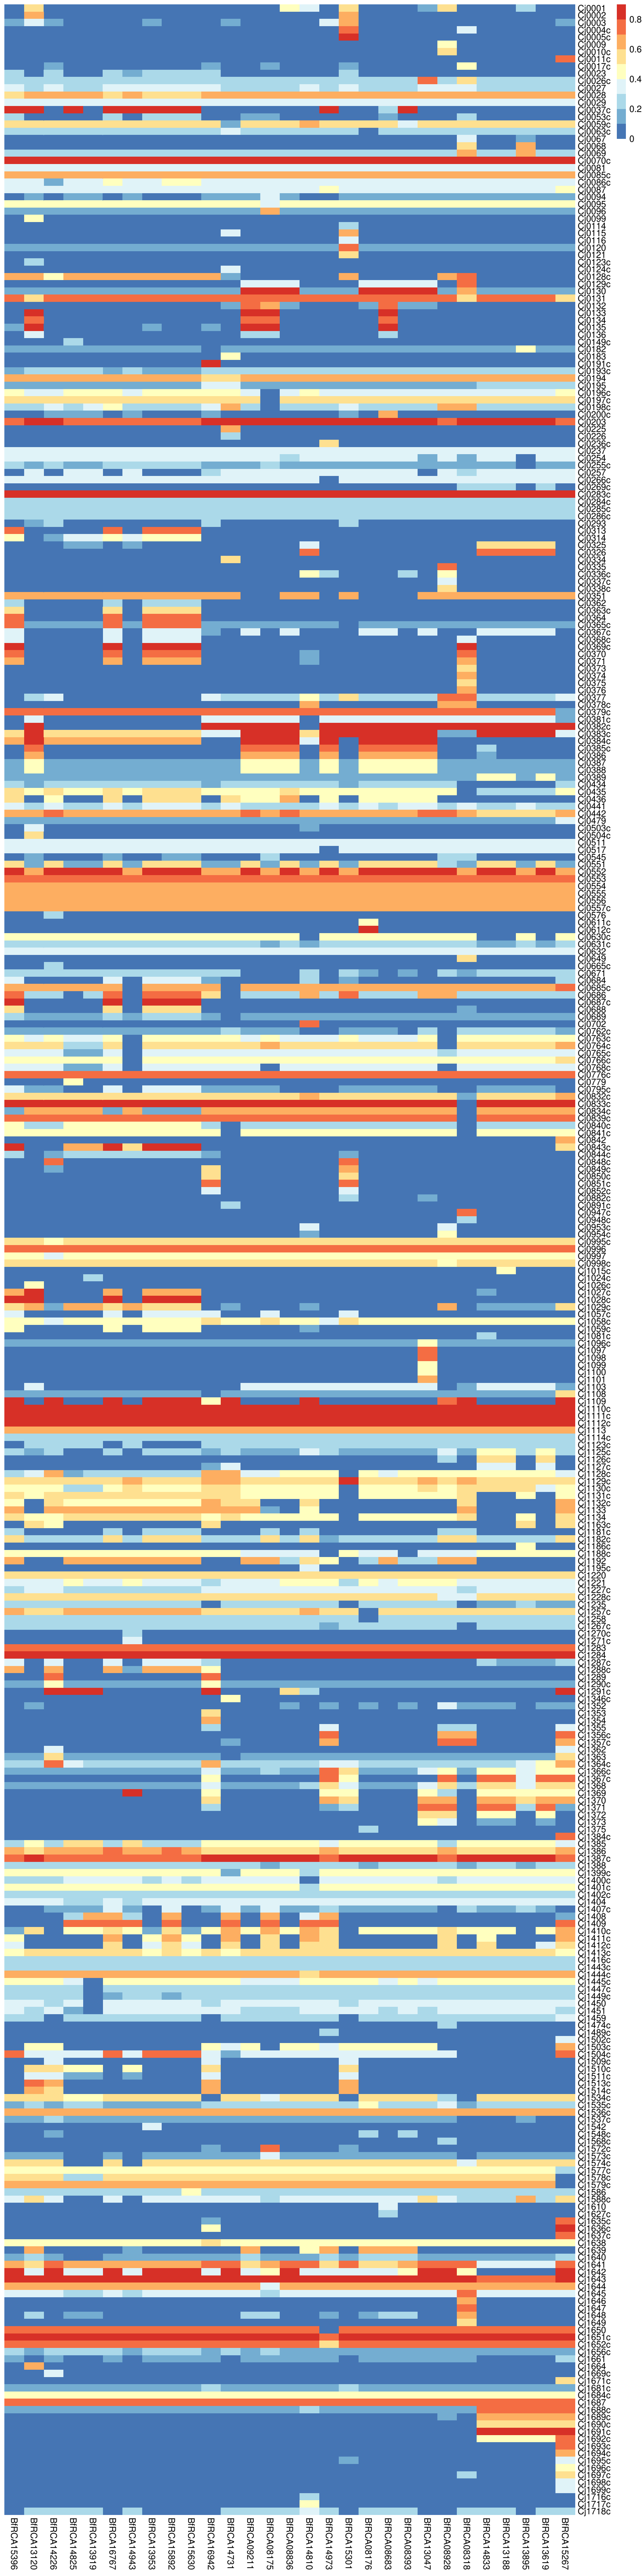

**Suppl. Fig. S3.** Heatmap visualization of genes with at least 20 % k-mer coverage of *C. jejuni* sequences identified in at least one of the 16 half hybrid strains (with <10 % *C. jejuni* introgression but with ambiguous qPCR result). X-axis, strains; y-axis, genes, sorted according to gene location in the reference *C. jejuni* NCTC 11168 sequence. Colours indicate coverage of gene length by *C. jejuni* sequence specific k-mers (16 bp) in % as detailed in the figure.

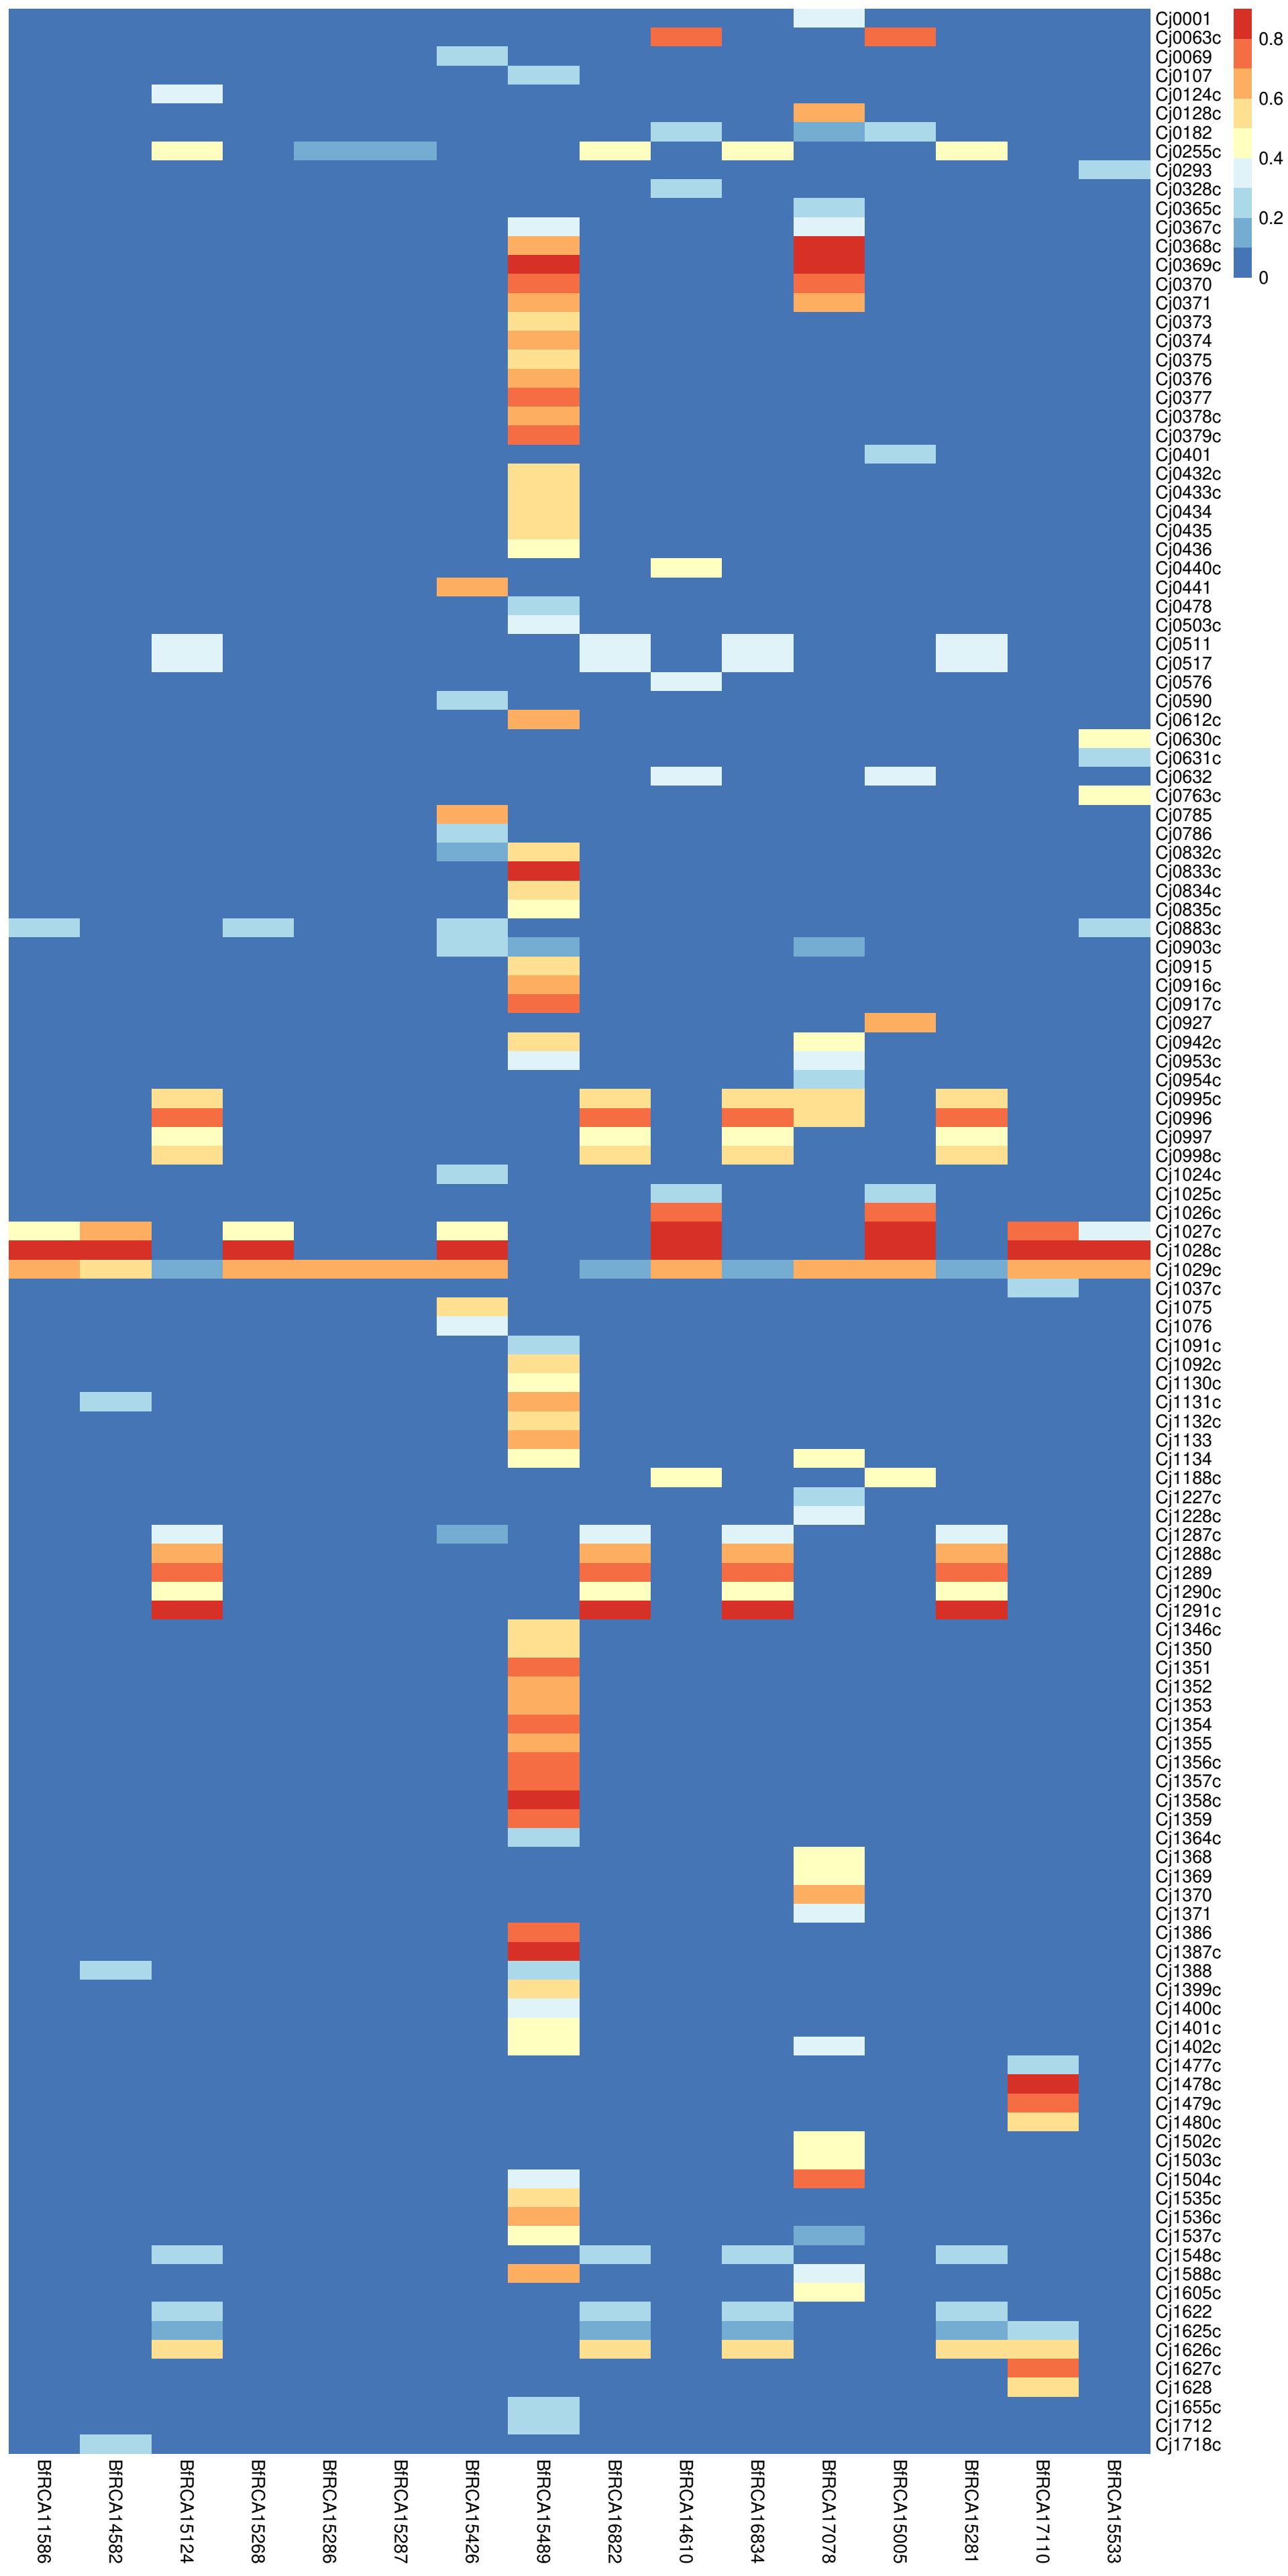



**Suppl. Fig. S4.** The distribution of simulated random recombination events in *C. coli* core genes (green) is significantly different from that of the observed recombination events in the hybrid strains (purple). This is indicative of a selection process (i. e. functional adaptation) after recombination.

Suppl. Fig. S4

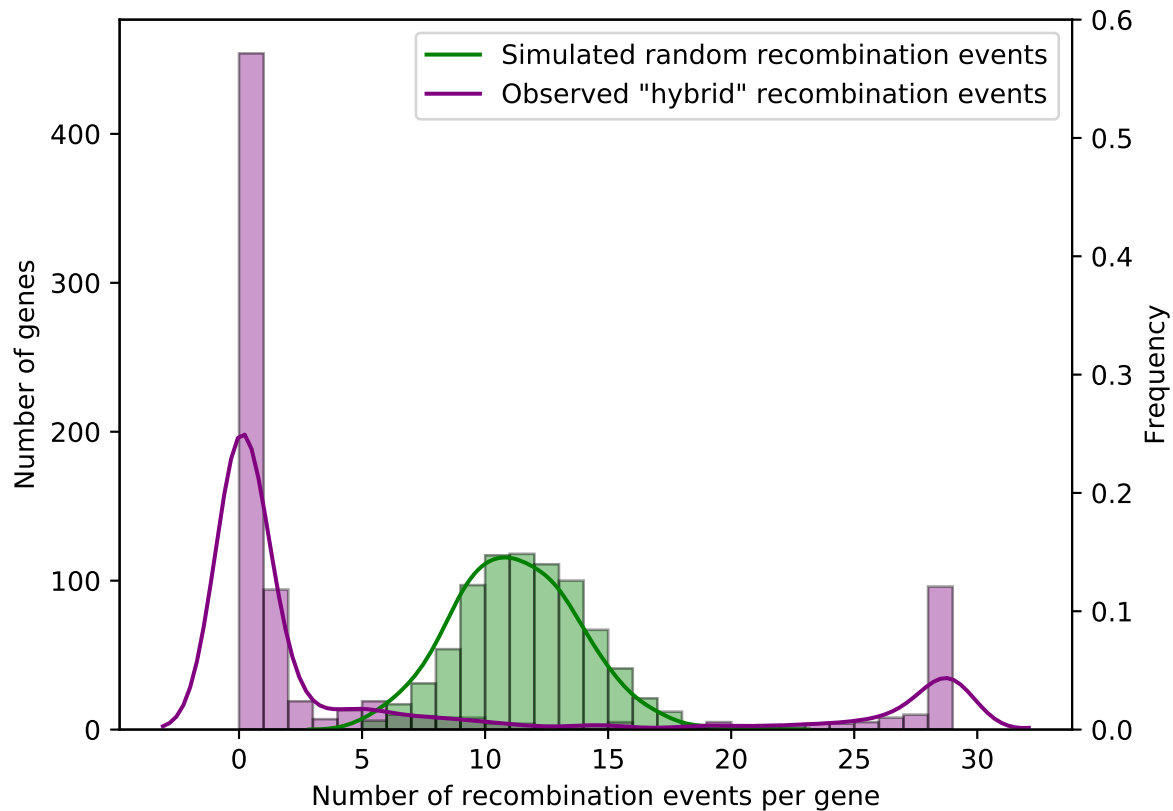

Supplement: 41598_2020_60320_MOESM1_ESM.pdf [file 41598_2020_60320_MOESM1_ESM.pdf]
